# Supplementary material
Source: PubMed Central journal article supplement (PMC7526811)
Supplement: AAC.00415-20-s0001.pdf [file AAC.00415-20-s0001.pdf]

**Chromosomal Resistance to Metronidazole in *Clostridioides difficile* can be Mediated by Epistasis Between Iron Homeostasis and Oxidoreductases**

Aditi Deshpande<sup>1#</sup>, Xiaoqian Wu<sup>1#</sup>, Wenwen Huo, Kelli Palmer<sup>2</sup>, Julian G. Hurdle<sup>1\*</sup>

<sup>1</sup>Center for Infectious and Inflammatory Diseases, Institute of Biosciences and Technology, Texas A&M Health Science Center, Houston, Texas 77030, USA.

<sup>2</sup>Department of Biological Sciences, University of Texas at Dallas, Richardson, TX 75080, USA.

\*Correspondence and requests for materials should be addressed to J.G.H ([jhurdle@tamu.edu](mailto:jhurdle@tamu.edu)).

#These authors equally contributed. Author order was determined both alphabetically and in order of increasing seniority.

## Table of contents

| Title                                                                                                                                | Page # |
|--------------------------------------------------------------------------------------------------------------------------------------|--------|
| Complementation of $\Delta mutSL$ strain with WT <i>mutSL</i> reverses mutability. <b>(Figure S1)</b>                                | S3     |
| Functional categories of mutated genes in endpoint mutants. <b>(Figure S2)</b>                                                       | S4     |
| Sequence alignments of PFOR homologs from <i>C. difficile</i> , <i>D. africanus</i> and <i>M. thermoacetica</i> . <b>(Figure S3)</b> | S5     |
| Analysis of <i>xdh</i> , including secondary structure differences in mRNA of WT and mutant. <b>(Figure S4)</b>                      | S6-7   |
| Structural analysis of valine-76 mutation site in <i>E. coli</i> dimeric IscR-bound to DNA. <b>(Figure S5)</b>                       | S8     |
| Transcriptional analysis of various ferredoxin and flavodoxin homologs upon exposure to MTZ. <b>(Figure S6)</b>                      | S9     |
| Original gel images for DNA damage. <b>(Figure S7)</b>                                                                               | S10    |
| Comparison of mutation frequencies for various mutator strains compared to WT. <b>(Table S1)</b>                                     | S11    |
| List of mutations in the endpoint mutants (JWD-1, JWD_2, JWD-3 and JWD-4). <b>(Table S2)</b>                                         | S12-20 |
| Genetic changes in the clinical isolates. <b>(Table S3)</b>                                                                          | S21    |
| List of strains and plasmids used in this study. <b>(Table S4)</b>                                                                   | S22-23 |
| List of all the primers used in this study. <b>(Table S5)</b>                                                                        | S24-27 |
| sgRNA constructs used in this study. <b>(Table S6)</b>                                                                               | S28-30 |
| BioSample Accession Numbers. <b>(Table S7)</b>                                                                                       | S30    |
| References                                                                                                                           | S31    |

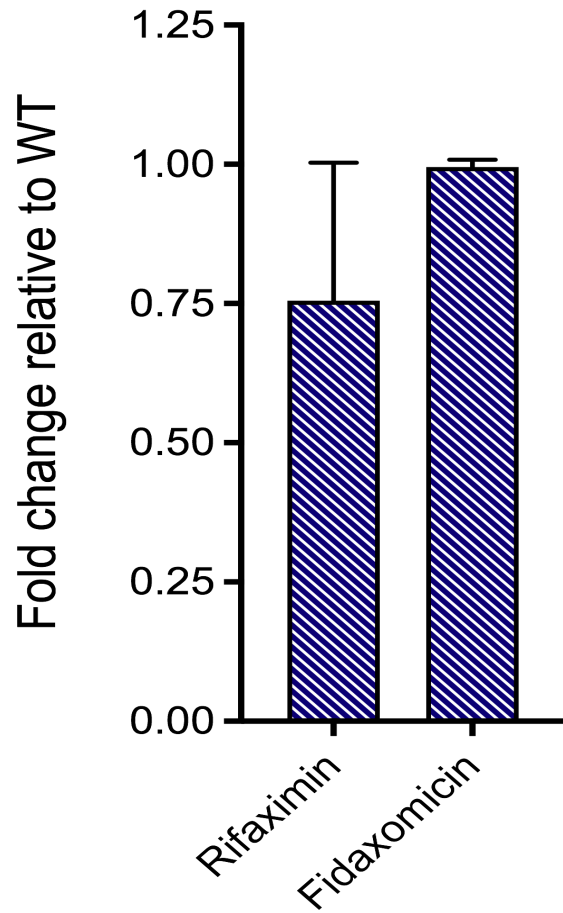

**Figure S1.** Complementation of the mutator reverses mutability. The mutator 700057 $\Delta$ *mutSL* was complemented with WT *mutSL* on its own promoter in the vector pMTL-84151. Mutation frequencies of the complemented strain relative to the WT (~0.75 fold for rifaximin and almost equal for fidaxomicin) showed reversal of mutability.

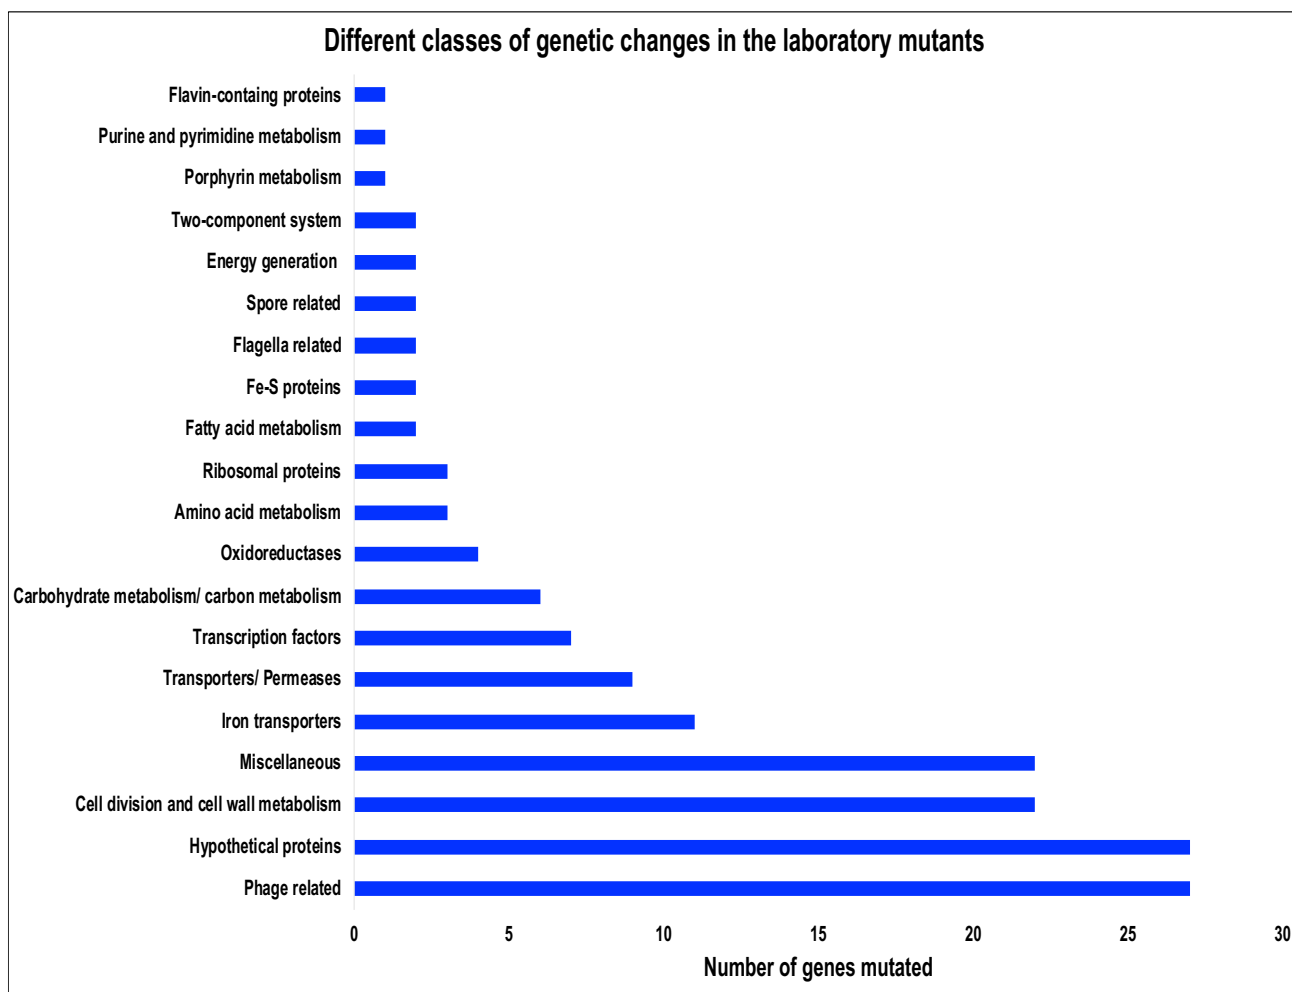

**Figure S2.** Functional categories of mutated genes found in the endpoint mutants (strains JWD-1 to JWD-4).

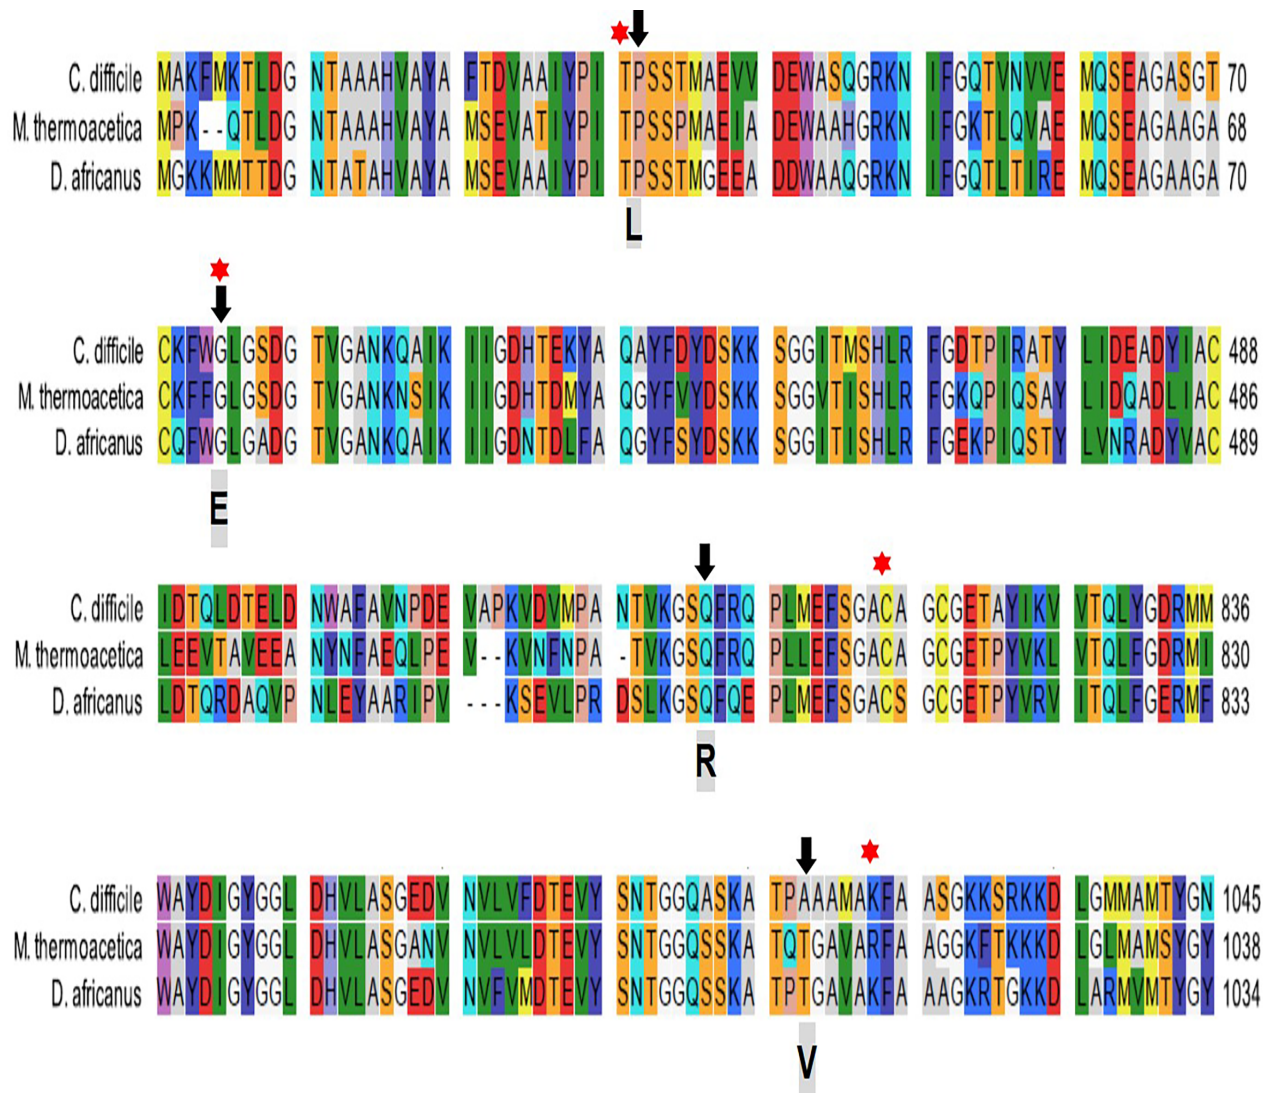

**Figure S3.** Alignments of PFOR of *C. difficile* (CD630\_26820), *Moorella thermoacetica* (Q2RMD6) and *Desulfovibrio africanus* (Desaf\_2186); substitutions are marked by black arrows and key conserved sites by red asterisks. In lab mutants, Pro<sub>32</sub>Leu and Gln<sub>803</sub>Arg lie close to critical Thr<sub>31</sub> and Cys<sub>815</sub> sites in PFOR catalytic domains. The Gly<sub>423</sub>Glu in CDI strain CD26A54\_R occurs in a conserve domain for coenzyme A binding, while Ala<sub>1018</sub>Val in CDI strains 491858 or 490054 are in domain VI, near arginine-1016 in *M. thermoacetica* thought to stabilize coenzyme A by charge-charge

interactions (structural analysis will be required to identify if *C. difficile* lysine-1023 has the same role in binding coenzyme A).

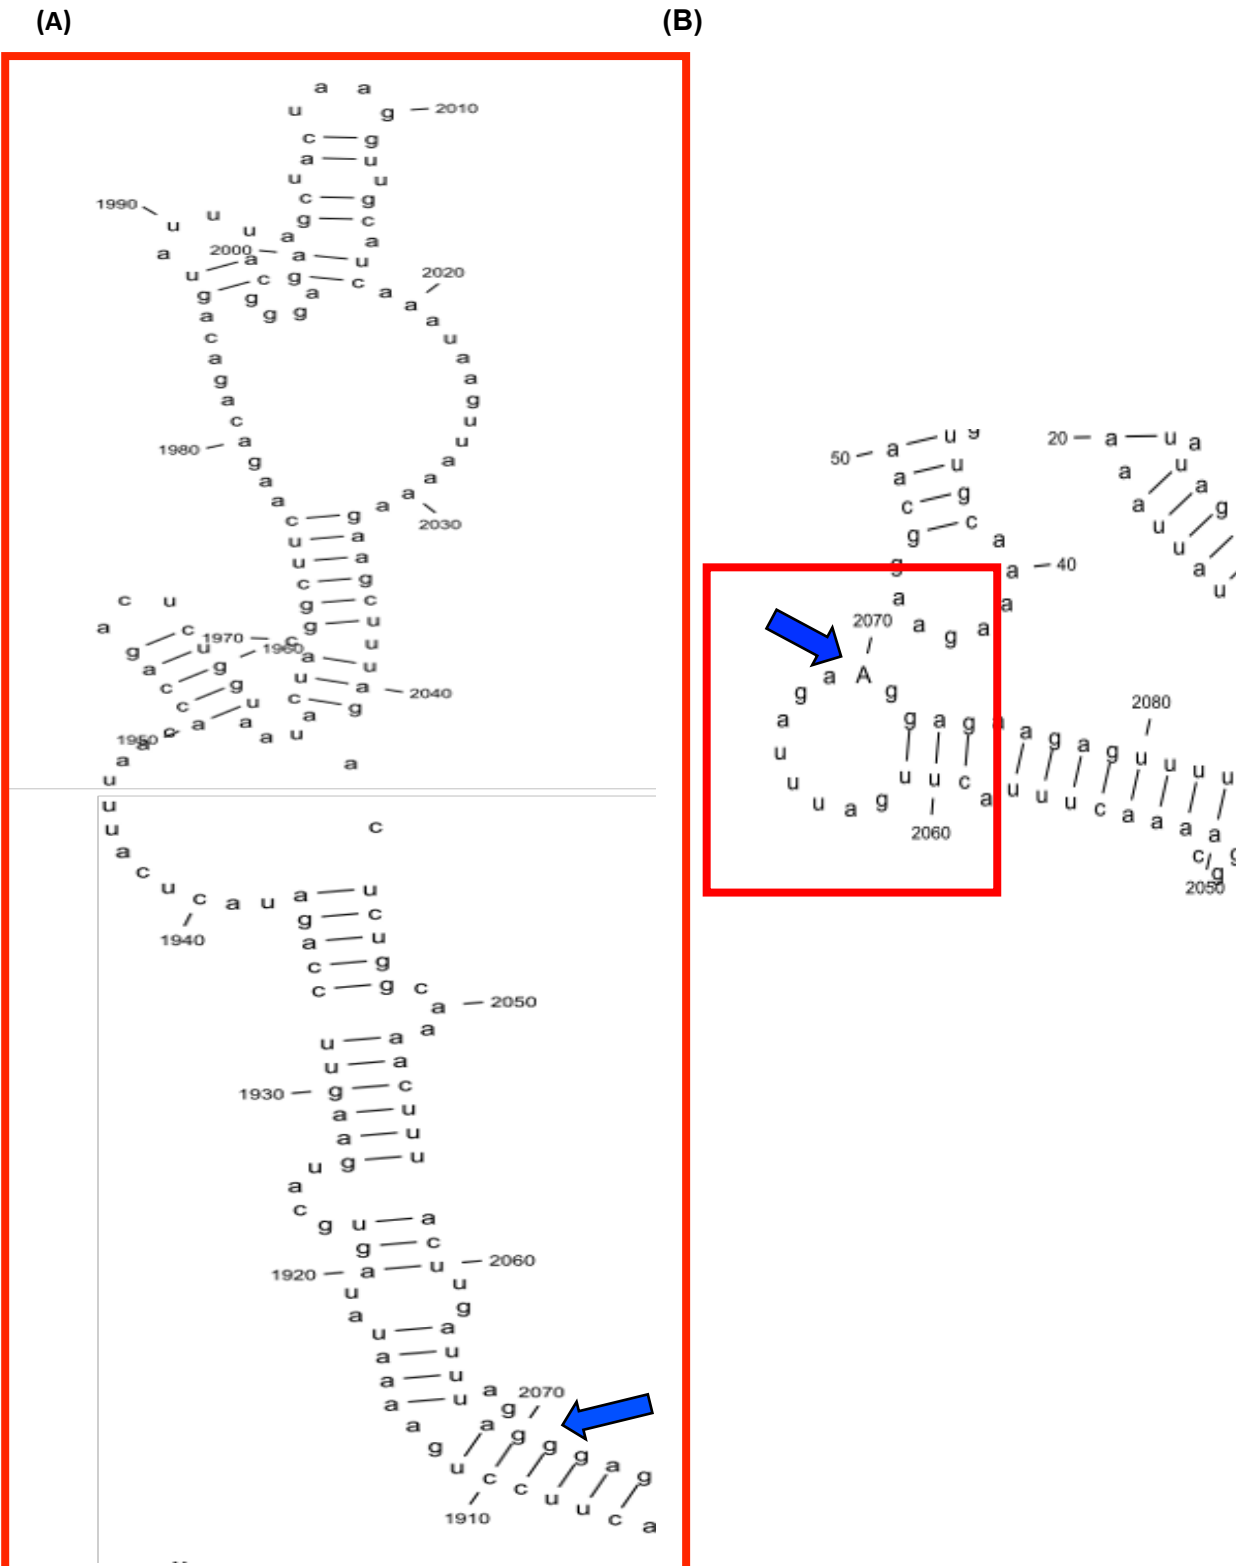

**Figure S4.** Analysis of xanthine dehydrogenase. **(A, B)** RNA secondary structure analysis of WT and mutant *xdh* (*CD630\_31770*) was done using the mfold algorithm in CLC Genomics Workbench 12.0. We analyzed the entire mRNA of 2562 nucleotides from WT and mutant, which differed by the SNP (**GAG**<sub>2070</sub>**GAA**). Blue arrows indicate position 2070. **(A)** In the secondary RNA structure of WT and *xdh* the mutation site is part of a large loop region, with base pairing between 1910 and 2070, which a free energy change of  $\Delta G = -25.9$  kcal/mol. **(B)** The mutation impacted this region, producing a new loop region (2062-2071 bases) that was significantly more unstable ( $\Delta G = 3.8$  kcal/mol) and there was no base pairing with position 1910. In general, the more positive the free energy the more unstable the mRNA, which may affect transcription and translation. Although the mfold algorithm is an established method to analyze thermodynamic stability of RNA, its results might differ from actual biological stability in cells. Noteworthy, *CD630\_31770* is annotated as *xdhA5* or *xdh* in *CD630* and *xdhA3* in *CDR20291\_3033* in R20291; herein to avoid confusion, it is referred to as *xdh*. *CD630\_31770* is predicted to be a molybdenum and iron-sulfur binding protein that is functionally related to oxidoreductase enzymes EC: 1.17.14 (xanthine dehydrogenase) and EC: 1.2.99.7 (aldehyde dehydrogenase). BLAST of *CD630* genome shows there are 4 homologs of *CD630\_31770* as follows: *xdhA1/CD630\_20730*, with 27.20% identities; *xdhA2/CD630\_20790*, with 27.62% identities; *xdhA3 /CD630\_20870*, with 31.30% identities; *xdhA4/CD630\_20990*, with 27.56% identities.

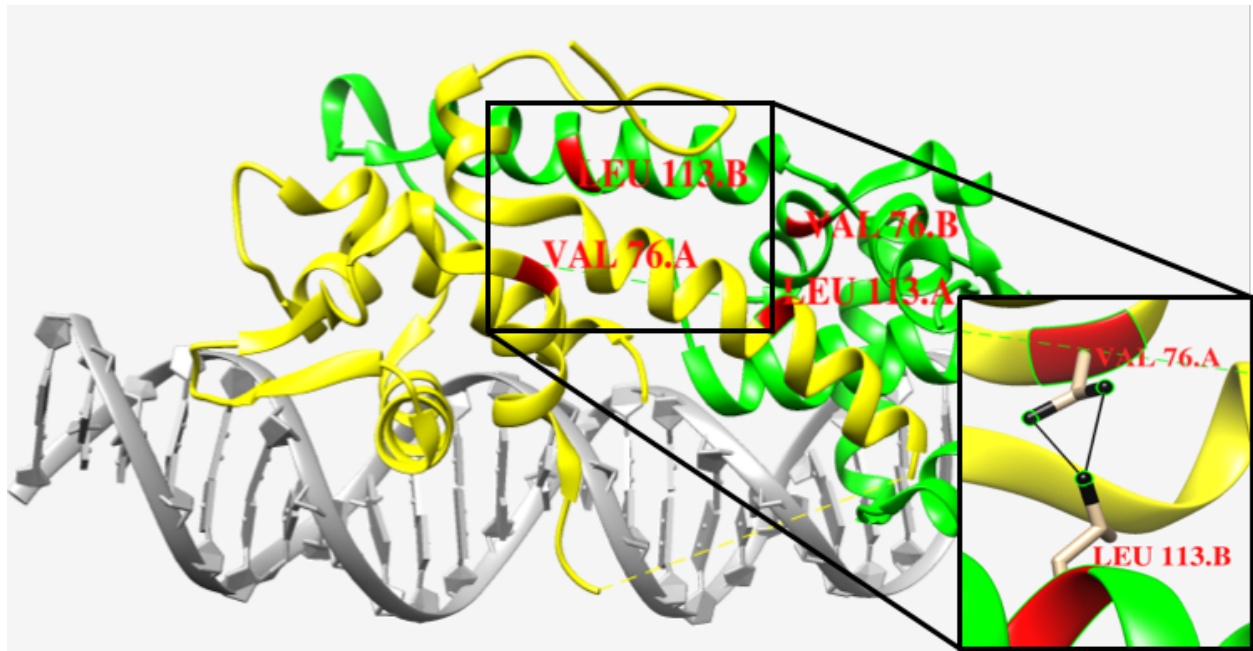

**Figure S5.** Structure of *E. coli* dimeric IscR bound to DNA (pdb ID: 4CHU) was analyzed using UCSF Chimera. Val-76 on chain A interacts with Leu-113 on chain B. Substitution of Val<sub>76</sub>Ala might lead to lesser hydrophobic Ala to reduce the DNA dimer-IscR complex stabilization.



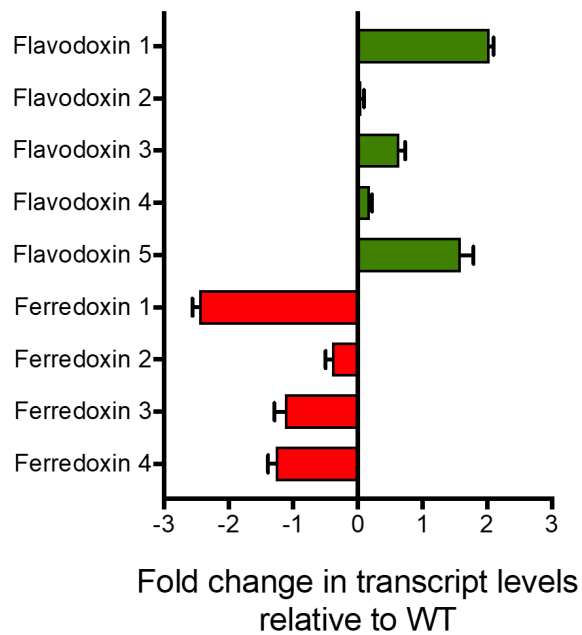

**Figure S6.** Analysis of flavodoxin (*fldx*) and ferredoxin (*fdx*) transcription as an indicator of cellular iron stress. In the absence of drug, compared to the parent WT, in the *feoB1* mutant all the flavodoxin homologs were upregulated, with flavodoxin 1 (CD630\_19990) being the most expressed compared to flavodoxin 2 [CD630\_28250], flavodoxin 3 [CD630\_16790], flavodoxin 4 [CD630\_31210] and flavodoxin 5 [CD630\_22070]. All ferredoxin homologs were downregulated, with ferredoxin 1 (CD630\_06271) being the most affected compared to others (ferredoxin 2 [CD630\_36051], ferredoxin 3 [CD630\_01721] and ferredoxin 4 [CD630\_01150]).

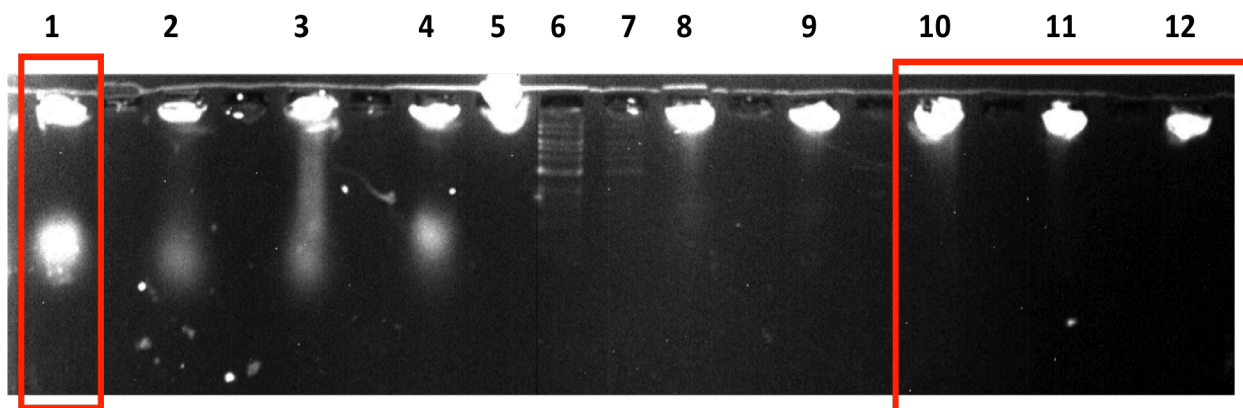

Lane 1: ATCC  $\Delta feoB1$ -empty vector – MTZ treated  
 Lane 2: ATCC  $\Delta feoB1$  –empty vector- MTZ treated  
 Lane 3: ATCC- Hydrogen peroxide treated  
 Lane 4: ATCC- MTZ treated  
 Lane 5: ATCC  $\Delta feoB1$  –*nifJi*- untreated  
 Lane 6: Ladder  
 Lane 7: Ladder

Lane 8: ATCC  $\Delta feoB1$ -*iscRi* – untreated  
 Lane 9: ATCC  $\Delta feoB1$  –*xdhAi*- untreated  
 Lane 10: ATCC-  $\Delta feoB1$  *nifJi*- MTZ treated  
 Lane 11: ATCC-  $\Delta feoB1$ -*iscRi* – MTZ treated  
 Lane 12: ATCC  $\Delta feoB1$  –*xdhAi*- MTZ treated

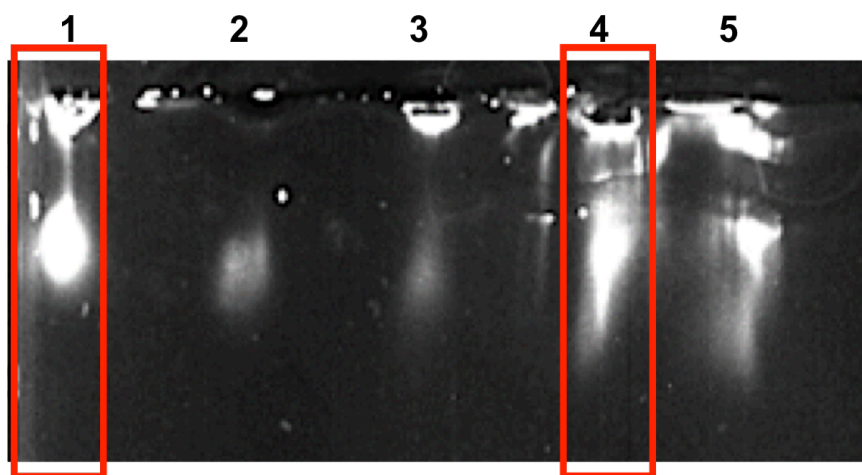

Lane 1: ATCC– MTZ treated  
 Lane 2: ATCC– MTZ treated  
 Lane 3: ATCC- MTZ treated  
 Lane 4: ATCC- Hydrogen peroxide treated  
 Lane 5: ATCC- Hydrogen peroxide treated

**Figure S7.** Original images of gels demonstrating DNA fragmentation caused by metronidazole or hydrogen peroxide. Lanes highlighted in red are those shown in the main manuscript. Shown are representative biological replicates; all gels above were run at the same time.

**Table S1.** Comparison of mutation frequencies for various strains; significance was established by unpaired t-tests versus WT ATCC700057 or  $\Delta mutSL$  double mutant.

| <b>Mutation frequencies against various strains</b>     |       |                |               |              |                |
|---------------------------------------------------------|-------|----------------|---------------|--------------|----------------|
| <b>(Average <math>\pm</math> Std x 10<sup>-8</sup>)</b> |       |                |               |              |                |
|                                                         | WT    | $\Delta mutS2$ | $\Delta mutS$ | $\Delta muL$ | $\Delta mutSL$ |
| <b>Rifaximin</b>                                        |       |                |               |              |                |
|                                                         | 2.64  | 2.26           | 71.1          | 115          | 208            |
|                                                         | $\pm$ | $\pm$          | $\pm$         | $\pm$        | $\pm$          |
|                                                         | 1.23  | 0.81           | 14.2          | 2.37         | 23.9           |
| p value wrt WT                                          | -     | 0.68           | 0.013         | <0.0001      | 0.005          |
| p value wrt $\Delta mutSL$                              | -     | 0.005          | 0.003         | 0.021        | -              |
| <b>Fidaxomicin</b>                                      |       |                |               |              |                |
|                                                         | 3.37E | 2.30           | 69.8          | 55.7         | 313            |
|                                                         | $\pm$ | $\pm$          | $\pm$         | $\pm$        | $\pm$          |
|                                                         | 0.58  | 0.3            | 2.52          | 6.73         | 45.6           |
| p value wrt WT                                          | -     | 0.065          | 0.0003        | 0.005        | 0.007          |
| p value wrt $\Delta mutSL$                              | -     | 0.007          | 0.011         | 0.009        | -              |

**Table S2.** Intragenic variations in metronidazole-resistant JWD-1, -2, -3 and -4.

- Yes or No in the last column indicates presence or absence of variation across the respective strains, as determined from genome analysis.
- Yellow highlight indicate the variations were found in Sanger sequences in Sanger sequences.
- Green highlight indicate the variation(s) were not found in Sanger sequences.

| Gene ontology     | Overlapping annotations            | Type      | Nucleotide change | Amino acid change | Metronidazole-resistant mutants |       |       |       |
|-------------------|------------------------------------|-----------|-------------------|-------------------|---------------------------------|-------|-------|-------|
|                   |                                    |           |                   |                   | JWD-1                           | JWD-2 | JWD-3 | JWD-4 |
| Iron transporters | Ferric iron ABC transporter        | SNV       | 170G>A            | Gly57Asp          | No                              | Yes   | No    | No    |
|                   | Ferrous iron transport protein B   | Deletion  | 117delA           | Glu40fs           | No                              | No    | No    | Yes   |
|                   | Ferric iron ABC transporter        | SNV       | 123A>T            | -                 | No                              | Yes   | Yes   | No    |
|                   | Ferric iron ABC transporter        | SNV       | 133C>T            | -                 | No                              | Yes   | Yes   | No    |
|                   | Ferric iron ABC transporter        | SNV       | 103C>T            | -                 | No                              | Yes   | Yes   | No    |
|                   | Ferric iron ABC transporter        | SNV       | 153G>A            | -                 | No                              | Yes   | Yes   | No    |
|                   | Ferric iron ABC transporter        | SNV       | 55T>C             | -                 | No                              | Yes   | Yes   | No    |
|                   | Ferric iron ABC transporter        | SNV       | 135A>G            | -                 | No                              | Yes   | Yes   | No    |
|                   | Ferric iron ABC transporter        | SNV       | 87A>G             | -                 | No                              | Yes   | Yes   | No    |
|                   | Ferric iron ABC transporter        | SNV       | 99T>C             | -                 | No                              | Yes   | Yes   | No    |
|                   | Ferric iron ABC transporter        | SNV       | 126G>A            | -                 | No                              | Yes   | Yes   | No    |
|                   | Ferrous iron transport protein B   | Insertion | 117_118 InsA      | Glu38fs           | Yes                             | Yes   | Yes   | No    |
| Oxidoreductases   | Pyruvate-flavodoxin oxidoreductase | SNV       | 2408A>G           | Gln803Arg         | Yes                             | Yes   | Yes   | No    |
|                   | Pyruvate-flavodoxin oxidoreductase | SNV       | 95C>T             | Pro32Leu          | No                              | No    | No    | Yes   |

|                                   |                                                                 |           |              |           |     |     |     |     |
|-----------------------------------|-----------------------------------------------------------------|-----------|--------------|-----------|-----|-----|-----|-----|
|                                   | Xanthine dehydrogenase_molybdenum binding subunit               | SNV       | 2070G>A      | -         | Yes | Yes | Yes | No  |
|                                   | Benzoyl-CoA reductase subunit BadE                              | Deletion  | 8delA        | Glu6fs    | No  | No  | No  | Yes |
| <b>Flavin-containing proteins</b> | Electron transfer flavoprotein_alpha subunit                    | SNV       | 737G>A       | Gly246Glu | No  | No  | No  | Yes |
| <b>Fe-S proteins</b>              | Iron-sulfur cluster regulator IscR                              | Deletion  | 153delA      | Lys51fs   | No  | Yes | No  | Yes |
|                                   | Iron-sulfur cluster regulator IscR                              | SNV       | 227T>C       | Val76Ala  | No  | No  | Yes | No  |
| <b>Transcription factors</b>      | Beta-glucoside bgl operon antiterminator_BglG family            | Deletion  | 97delA       | Arg33fs   | No  | Yes | Yes | No  |
|                                   | Transcriptional antiterminator of lichenan operon_BglG family   | SNV       | 177T>C       | -         | No  | No  | No  | Yes |
|                                   | Tn916_transcriptional regulator_putative                        | SNV       | 626G>A       | Arg209His | Yes | No  | No  | No  |
|                                   | Xre family DNA-binding domain and TPR-repeat-containing protein | Insertion | 923_924 insA | Asn308fs  | No  | Yes | Yes | No  |
|                                   | Transcriptional regulators of sugar metabolism                  | Deletion  | 118delA      | Ile40fs   | No  | Yes | Yes | No  |
|                                   | NtrC family Transcriptional regulator_ATPase domain             | Deletion  | 237delA      | Thr79fs   | No  | No  | Yes | No  |
|                                   | Transcriptional regulator_FUR family                            | Deletion  | 90delA       | Asp33fs   | No  | No  | No  | Yes |
| <b>Amino acid metabolism</b>      | 3-dehydroquinase synthase                                       | Deletion  | 97delA       | Ile33fs   | No  | No  | No  | Yes |
|                                   | Putative aminopeptidase                                         | SNV       | 754G>A       | Asp252Asn | No  | No  | No  | Yes |
|                                   | Histidinol-phosphate aminotransferase                           | SNV       | 390T>C       | -         | No  | No  | Yes | No  |
|                                   |                                                                 |           |              |           |     |     |     |     |

|                                                 |                                                       |          |          |           |     |     |     |     |
|-------------------------------------------------|-------------------------------------------------------|----------|----------|-----------|-----|-----|-----|-----|
| <b>Carbohydrate/<br/>Carbon<br/>metabolism</b>  | Acetate kinase                                        | SNV      | 67G>A    | Glu23Lys  | No  | No  | No  | Yes |
|                                                 | Alcohol dehydrogenase                                 | SNV      | 606G>A   | -         | No  | No  | No  | Yes |
|                                                 | Endoglucanase                                         | SNV      | 939G>A   | -         | No  | No  | No  | Yes |
|                                                 | Endoglucanase                                         | Deletion | 53delT   | Leu18fs   | No  | No  | No  | Yes |
|                                                 | PTS system_fructose-specific IIB component            | SNV      | 235G>A   | Glu79Lys  | No  | No  | No  | Yes |
|                                                 | Similar to carbon monoxide dehydrogenase CooS subunit | SNV      | 740A>G   | Tyr247Cys | Yes | Yes | Yes | No  |
|                                                 |                                                       |          |          |           |     |     |     |     |
| <b>Fatty acid<br/>metabolism</b>                | Enoyl-[acyl-carrier-protein] reductase [FMN]          | SNV      | 341C>A   | Pro114His | Yes | Yes | Yes | No  |
|                                                 | Cardiolipin synthetase                                | Deletion | 1198delA | Ile401fs  | No  | No  | No  | Yes |
|                                                 |                                                       |          |          |           |     |     |     |     |
| <b>Porphyrin<br/>metabolism</b>                 | Cobalt-precorrin-4 C11-methyltransferase              | SNV      | 563T>C   | Ile188Thr | No  | No  | No  | Yes |
|                                                 |                                                       |          |          |           |     |     |     |     |
| <b>Purine and<br/>pyrimidine<br/>metabolism</b> | 2',3'-cyclic-nucleotide 2'-phosphodiesterase          | SNV      | 509T>C   | Val170Ala | No  | No  | No  | Yes |
|                                                 |                                                       |          |          |           |     |     |     |     |
| <b>Transporters/<br/>Permeases</b>              | ABC transporter permease protein                      | SNV      | 576A>G   | -         | No  | No  | Yes | Yes |
|                                                 | ABC transporter permease protein                      | SNV      | 540T>C   | -         | No  | No  | No  | Yes |
|                                                 | ABC transporter permease protein                      | SNV      | 412T>C   | Phe138Leu | No  | No  | No  | Yes |
|                                                 | Amino acid ABC transporter_ATP-binding protein        | Deletion | 341delA  | Glu114fs  | No  | Yes | Yes | No  |
|                                                 | Xanthine permease                                     | SNV      | 809G>A   | Gly270Asp | No  | No  | No  | Yes |
|                                                 | EcsC protein                                          | SNV      | 60G>A    | Trp20*    | No  | Yes | Yes | No  |
|                                                 | ABC transporter permease protein                      | Deletion | 11delA   | Asn4fs    | Yes | Yes | Yes | No  |
|                                                 | ABC transporter permease protein                      | Deletion | 327delA  | Pro109fs  | Yes | Yes | No  | No  |
|                                                 | Ethanolamine permease                                 | SNV      | 987T>C   | -         | No  | Yes | No  | No  |

|                                                     |                                                                     |          |                     |                           |     |     |     |     |
|-----------------------------------------------------|---------------------------------------------------------------------|----------|---------------------|---------------------------|-----|-----|-----|-----|
| <b>Flagella-related proteins</b>                    | Flagellar hook-associated protein FlgK                              | SNV      | 1183G>A             | Val395Ile                 | No  | No  | No  | Yes |
|                                                     | Flagellar hook-length control protein FliK                          | SNV      | 2712G>A             | -                         | No  | No  | No  | Yes |
| <b>Sporulation-related proteins</b>                 | Putative small acid-soluble spore protein                           | Deletion | 167delA             | Asn56fs                   | No  | No  | No  | Yes |
|                                                     | RNA polymerase sporulation specific sigma factor SigK               | SNV      | 38C>T               | Pro13Leu                  | No  | Yes | No  | No  |
| <b>Cell division and cell wall-related proteins</b> | Cell division protein FtsH                                          | SNV      | 840T>C              | -                         | No  | No  | No  | Yes |
|                                                     | N-acetylmuramoyl-L-alanine amidase                                  | SNV      | 282C>T              | -                         | No  | No  | No  | Yes |
|                                                     | N-acetylmuramoyl-L-alanine amidase                                  | SNV      | 132C>T              | -                         | No  | Yes | Yes | No  |
|                                                     | N-acetylmuramoyl-L-alanine amidase                                  | SNV      | 39_40 delGG insAC   | Gly13_Ala14 del insGlyPro | No  | Yes | Yes | No  |
|                                                     | N-acetylmuramoyl-L-alanine amidase                                  | SNV      | 13G>A               | Val5Ile                   | No  | Yes | Yes | No  |
|                                                     | N-acetylmuramoyl-L-alanine amidase                                  | SNV      | 152_153 delAA insCC | Lys51Thr                  | No  | Yes | No  | No  |
|                                                     | N-acetylmuramoyl-L-alanine amidase                                  | SNV      | 808T>C              | -                         | No  | Yes | Yes | No  |
|                                                     | UDP-N-acetylmuramoylalanine-D-glutamate--2,6-diaminopimelate ligase | SNV      | 882A>G              | -                         | No  | Yes | No  | No  |
|                                                     | N-acetylmuramoyl-L-alanine amidase                                  | SNV      | 33G>A               | -                         | No  | Yes | Yes | No  |
|                                                     | Cell division protein FtsK                                          | SNV      | 2058A>G             | -                         | Yes | Yes | Yes | No  |
|                                                     | N-acetylmuramoyl-L-alanine amidase                                  | SNV      | 72A>G               | -                         | No  | Yes | Yes | No  |
|                                                     | CDP-glycerol:poly(glycerophosphate) glycerophosphotransferase       | SNV      | 13delA              | Lys5fs                    | No  | Yes | No  | No  |
| N-acetylmuramoyl-L-alanine amidase                  | SNV                                                                 | 816T>C   | -                   | No                        | Yes | No  | No  |     |

|                               |                                                       |           |                     |           |     |     |     |     |
|-------------------------------|-------------------------------------------------------|-----------|---------------------|-----------|-----|-----|-----|-----|
|                               | N-acetylmuramoyl-L-alanine amidase                    | SNV       | 60G>T               | -         | No  | Yes | Yes | No  |
|                               | N-acetylmuramoyl-L-alanine amidase                    | SNV       | 122_123 delCT insAA | Thr41Lys  | No  | Yes | Yes | No  |
|                               | N-acetylmuramoyl-L-alanine amidase                    | SNV       | 150C>T              | -         | No  | Yes | Yes | No  |
|                               | N-acetylmuramoyl-L-alanine amidase                    | SNV       | 162T>C              | -         | No  | Yes | Yes | No  |
|                               | N-acetylmuramoyl-L-alanine amidase                    | SNV       | 168C>T              | -         | No  | Yes | Yes | No  |
|                               | N-acetylmuramoyl-L-alanine amidase                    | Insertion | 87A>G               | -         | No  | Yes | Yes | No  |
|                               | N-acetylmuramoyl-L-alanine amidase                    | SNV       | 171A>G              | -         | No  | Yes | Yes | No  |
|                               | N-acetylmuramoyl-L-alanine amidase                    | Deletion  | 129T>C              | -         | No  | Yes | No  | No  |
|                               | putative amidohydrolase                               | SNV       | 55_56 insA          | Glu19fs   | No  | Yes | No  | No  |
|                               |                                                       |           |                     |           |     |     |     |     |
| <b>Ribosomal proteins</b>     | rRNA: rRNA                                            | SNV       |                     | -         | Yes | No  | No  | Yes |
|                               | DNA-directed RNA polymerase beta subunit              | SNV       | 2104G>A             | Ala702Thr | Yes | No  | No  | No  |
|                               | COG1399 protein_clustered with ribosomal protein L32p | Deletion  | 257delT             | Leu86fs   | Yes | No  | No  | No  |
|                               |                                                       |           |                     |           |     |     |     |     |
| <b>Two-component systems</b>  | Osmosensitive K+ channel histidine kinase KdpD        | Insertion | 37_38insA           | Ile13fs   | No  | No  | No  | Yes |
|                               | Two-component sensor histidine kinase                 | SNV       | 652T>A              | Leu218Ile | No  | No  | Yes | No  |
|                               |                                                       |           |                     |           |     |     |     |     |
| <b>Phage related proteins</b> | Phage antirepressor protein                           | SNV       | 401T>C              | Val134Ala | No  | No  | No  | Yes |
|                               | Phage tail fiber protein                              | SNV       | 228T>C              | -         | No  | No  | No  | Yes |
|                               | Phage-like element PBSX protein xkdK                  | SNV       | 447T>A              | -         | No  | Yes | Yes | No  |
|                               | Phage-like element PBSX protein xkdK                  | SNV       | 441C>T              | -         | No  | Yes | Yes | No  |



|                                        |     |                       |                                |     |     |     |    |
|----------------------------------------|-----|-----------------------|--------------------------------|-----|-----|-----|----|
| Phage-like element PBSX protein xkdK   | SNV | 438T>A                | -                              | No  | Yes | Yes | No |
| Phage-like element PBSX protein xkdK   | SNV | 420C>T                | -                              | No  | Yes | Yes | No |
| Phage-like element PBSX protein xkdK   | SNV | 384C>T                | -                              | No  | Yes | Yes | No |
| Phage-like element PBSX protein xkdK   | SNV | 375T>A                | -                              | No  | Yes | Yes | No |
| Phage-like element PBSX protein xkdK   | SNV | 348_349 delGA insAG   | Leu116_Ile 117del ins Leu Val  | No  | Yes | Yes | No |
| Phage-like element PBSX protein xkdK   | SNV | 345C>T                | -                              | No  | Yes | Yes | No |
| Phage-like element PBSX protein xkdK   | SNV | 300G>A                | -                              | Yes | Yes | Yes | No |
| Phage-related protein                  | SNV | 612G>A                | -                              | No  | Yes | No  | No |
| Phage tail length tape-measure protein | SNV | 1299G>T               | -                              | Yes | Yes | Yes | No |
| Phage-like element PBSX protein xkdK   | SNV | 358_360 delGTA insACT | Val120Thr                      | No  | Yes | No  | No |
| Phage-like element PBSX protein xkdK   | SNV | 288T>C                | -                              | Yes | Yes | Yes | No |
| Phage replication initiation protein   | SNV | 708G>A                | -                              | No  | No  | No  | No |
| Phage-like element PBSX protein xkdK   | SNV | 330A>G                | -                              | No  | Yes | Yes | No |
| Phage-like element PBSX protein xkdK   | SNV | 312C>T                | -                              | No  | Yes | Yes | No |
| Phage-like element PBSX protein xkdK   | SNV | 315_316 del GA ins AG | Lys105_Ile 106 del ins Lys Val | No  | Yes | Yes | No |
| Phage-like element PBSX protein xkdK   | SNV | 326T>C                | Ile109Thr                      | No  | Yes | Yes | No |
| Phage-like element PBSX protein xkdK   | SNV | 570C>T                | -                              | No  | Yes | Yes | No |

|                              |                                      |             |                        |           |    |     |     |     |
|------------------------------|--------------------------------------|-------------|------------------------|-----------|----|-----|-----|-----|
|                              | Phage-like element PBSX protein xkdK | SNV         | 334G>T                 | Val112Leu | No | Yes | Yes | No  |
|                              | Phage-like element PBSX protein xkdK | SNV         | 430A>G                 | Ile144Val | No | Yes | Yes | No  |
|                              | Phage-related protein                | SNV         | 609_610 del TT ins CC  | -         | No | Yes | No  | No  |
|                              | Phage-like element PBSX protein xkdK | Replacement | 359_360 del TA ins ACT | Val120fs  | No | No  | Yes | No  |
|                              | Phage-like element PBSX protein xkdK | SNV         | 381T>C                 | -         | No | Yes | Yes | No  |
|                              | Phage-like element PBSX protein xkdK | SNV         | 444T>C                 | -         | No | Yes | Yes | No  |
|                              |                                      |             |                        |           |    |     |     |     |
| <b>Hypothetical Proteins</b> | FIG00514869:_hypothetical protein    | SNV         | 599C>T                 | Ala200Val | No | No  | No  | Yes |
|                              | FIG00515698:_hypothetical protein    | SNV         | 2679G>A                | -         | No | No  | No  | Yes |
|                              | FIG00517149:_hypothetical protein    | Deletion    | 21delA                 | Lys7fs    | No | No  | No  | Yes |
|                              | FIG00518329:_hypothetical protein    | Deletion    | 1461delA               | Lys487fs  | No | No  | Yes | No  |
|                              | FIG00518900:_hypothetical protein    | SNV         | ad4A>G                 | Thr62Ala  | No | No  | No  | Yes |
|                              | Hypothetical protein                 | SNV         | 60G>A                  | Trp20*    | No | Yes | Yes | No  |
|                              | Hypothetical protein                 | SNV         | 60T>C                  | -         | No | 0   | 0   | Yes |
|                              | Hypothetical protein                 | SNV         | 244T>C                 | 82Gln*    | No | 0   | 0   | Yes |
|                              | FIG00514672:_hypothetical protein    | SNV         | 204T>C                 | -         | No | Yes | Yes | No  |
|                              | FIG00521667:_hypothetical protein    | SNV         | 1006T>C                | Cys336Arg | No | Yes | 0   | No  |
|                              | FIG00513672:_hypothetical protein    | SNV         | 920C>T                 | Pro307Leu | No | 0   | 0   | Yes |
|                              | FIG00518735:_hypothetical protein    | SNV         | 391G>A                 | Asp131Asn | No | 0   | 0   | Yes |

|                                   |                                                        |          |          |           |     |     |     |     |
|-----------------------------------|--------------------------------------------------------|----------|----------|-----------|-----|-----|-----|-----|
|                                   | FIG00516442:_hypothetical protein                      | SNV      | 54G>A    | -         | No  | 0   | 0   | Yes |
|                                   | FIG00516222:_hypothetical protein                      | SNV      | 393T>C   | -         | Yes | Yes | Yes | No  |
|                                   | FIG00515235:_hypothetical protein                      | Deletion | 519delA  | Ile173fs  | Yes | Yes | Yes | No  |
|                                   | FIG00512719:_hypothetical protein                      | SNV      | 339T>C   | -         | Yes | Yes | Yes | No  |
|                                   | FIG00519548:_hypothetical protein                      | SNV      | 559T>C   | Ser187Pro | No  | Yes | Yes | No  |
|                                   | FIG00516776:_hypothetical protein                      | SNV      | 126T>C   | -         | No  | Yes | No  | No  |
|                                   | FIG00514341:_hypothetical protein                      | Deletion | 1610delA | Asn537fs  | No  | Yes | Yes | No  |
|                                   | FIG00514462:_hypothetical protein                      | Deletion | 1184delA | Asn395fs  | No  | Yes | Yes | No  |
|                                   | FIG099352:_hypothetical protein                        | Deletion | 725delA  | Lys242fs  | Yes | Yes | Yes | No  |
|                                   |                                                        |          |          |           |     |     |     |     |
| <b>Energy-generation proteins</b> | ATP synthase alpha chain                               | SNV      | 1228C>T  | Leu410Phe | Yes | Yes | Yes | No  |
|                                   | ATP synthase alpha chain                               | SNV      | 892C>T   | Leu298Phe | No  | No  | No  | Yes |
|                                   |                                                        |          |          |           |     |     |     |     |
| <b>Miscellaneous</b>              | FIG060329:_MOSC domain protein                         | SNV      | 227G>A   | Gly76Glu  | No  | No  | No  | Yes |
|                                   | FIG146085:_3'-to-5' oligoribonuclease A, Bacillus type | SNV      | 131G>T   | Arg44Met  | No  | No  | No  | Yes |
|                                   | Putative membrane protein YeiH                         | SNV      | 821C>T   | Ala274Val | Yes | Yes | Yes | No  |
|                                   | putative phage membrane protein                        | SNV      | 237A>G   | -         | No  | Yes | Yes | No  |
|                                   | RNA methyltransferase_TrmA family                      | SNV      | 449A>G   | Lys150Arg | No  | No  | No  | Yes |

|                                                                   |           |              |           |     |     |     |     |
|-------------------------------------------------------------------|-----------|--------------|-----------|-----|-----|-----|-----|
| tRNA uridine 5-carboxymethyl-aminomethyl modification enzyme GidA | SNV       | 380T>C       | Val127Ala | No  | No  | No  | Yes |
| Membrane protein_putative                                         | SNV       | 685C>T       | Pro229Ser | No  | No  | No  | Yes |
| Putative phage membrane protein                                   | SNV       | 240A>G       | -         | Yes | Yes | Yes | No  |
| Putative phage membrane protein                                   | SNV       | 252T>C       | -         | No  | Yes | Yes | No  |
| Probable oligoendopeptidase F                                     | SNV       | 332A>G       | Gln111Arg | No  | Yes | Yes | No  |
| Late competence protein ComEC_DNA transport                       | SNV       | 785T>C       | Met262Thr | No  | Yes | Yes | No  |
| Antirestriction protein                                           | SNV       | 344A>G       | Asp115Gly | Yes | Yes | Yes | No  |
| Serine-protein kinase RsbW                                        | Deletion  | 193delT      | Phe65fs   | Yes | Yes | Yes | No  |
| Similar to terminase small subunit_yqaS homolog                   | Deletion  | 192delA      | Gly65fs   | No  | No  | No  | No  |
| Resolvase-like:Recombinase                                        | Insertion | 726_727 insA | Gln243fs  | No  | Yes | Yes | No  |
| Pantoate--beta-alanine ligase                                     | Insertion | 119_120 insA | Ala43fs   | No  | No  | No  | Yes |
| Mobile element protein                                            | SNV       | 132G>T       | -         | No  | No  | No  | Yes |
| D-aminoacylase                                                    | SNV       | 916C>T       | -         | No  | No  | No  | Yes |
| Metallo-dependent hydrolases_subgroup B                           | SNV       | 337A>T       | Lys113*   | No  | No  | No  | Yes |
| Nitrogen regulation protein NtrX                                  | SNV       | 666G>A       | -         | No  | No  | No  | Yes |
| Ornithine cyclodeaminase                                          | SNV       | 438G>A       | Met146Ile | No  | No  | Yes | No  |
| Putative response regulator; homolog of RumR and ScnR             | SNV       | 204T>C       | -         | No  | No  | No  | Yes |

**Table S3. Genetic changes in the clinical isolates**

- Yes or No in the last column indicates presence or absence of variation across the respective strains, as determined from genome analysis.
- Yellow highlight indicate the variations were found in Sanger sequences.

| Genes                                                  | Annotations   | Clinical strains  |                   |                   |                   |
|--------------------------------------------------------|---------------|-------------------|-------------------|-------------------|-------------------|
|                                                        |               | 491858            |                   | 495004            |                   |
|                                                        |               | Nucleotide change | Amino acid change | Nucleotide change | Amino acid change |
| Pyruvate-ferredoxin oxidoreductase (PFOR)              | CDR20291_2570 | 3053C>T           | Ala1018Val        | 3053C>T           | Ala1018Val        |
| Putative 5-nitroimidazole reductase (Nim)              | CDR20291_1308 | 389A>C            | Tyr130Ser         | 389A>C            | Tyr130Ser         |
| Putative 5-nitroimidazole reductase (Nim)              | CDR20291_1308 | -                 | -                 | 463A>T            | Ile155Leu         |
| Putative ruberythrin (Rbr)                             | CDR20291_1323 | 412C>A            | Gln138Lys         | 412C>A            | Gln138Lys         |
| Quinolinate synthase (NadA)                            | CDR20291_2259 | 205C>A            | Leu69Ile          | 205C>A            | Leu69Ile          |
| Electron transfer flavoprotein beta-subunit (EtfB)     | CDR20291_0735 | 31T>C             | Ser11Pro          | 31T>C             | Ser11Pro          |
| Response regulator VanR                                | CDR20291_1522 | 343A>G            | Thr115Ala         | 343A>G            | Thr115Ala         |
| UDP-N-acetylmuramoyl-alanine-D-glutamate ligase (MurD) | CDR20291_2541 | 902C>T            | Thr301Ile         | 902C>T            | Thr301Ile         |
| RNA polymerase B (RpoB)                                | CDR20291_0060 | 1514G>A           | Arg505Lys         | 1514G>A           | Arg505Lys         |
| Recombination protein (RecA)                           | CDR20291_1169 | -                 | -                 | 28G>A             | Ala10Thr          |

**Table S4.** Bacterial strains and plasmids.

| <b>Strains</b>                                     | <b>Description</b>                                                                                                                                        | <b>Reference/ Source</b>                                |
|----------------------------------------------------|-----------------------------------------------------------------------------------------------------------------------------------------------------------|---------------------------------------------------------|
| <b><i>E. coli</i></b>                              |                                                                                                                                                           |                                                         |
| NEB 5- alpha                                       | <i>fhuA2</i> $\Delta$ ( <i>argF-lacZ</i> ) <i>U169 phoA glnV44 <math>\Phi</math>80 <math>\Delta</math>(lacZ)M15 gyrA96 recA1 relA1 endA1 thi-1 hsdR17</i> | New England Biolabs                                     |
| CA434                                              | <i>E. coli</i> HB101 with plasmid R702                                                                                                                    | 22                                                      |
| SD46                                               |                                                                                                                                                           | Dr. Robert Britton, Baylor College of Medicine, Houston |
| <b><i>C. difficile</i></b>                         |                                                                                                                                                           |                                                         |
| ATCC 700057                                        | Wild type, <i>tcdA</i> <sup>-</sup> <i>tcdB</i> <sup>-</sup> , Ribotype 038                                                                               | ATCC                                                    |
| ATCC 700057 $\Delta$ <i>mutS</i>                   | $\Delta$ <i>mutS</i> deletion                                                                                                                             | This study                                              |
| ATCC 700057 $\Delta$ <i>mutL</i>                   | $\Delta$ <i>mutL</i> deletion                                                                                                                             | This study                                              |
| ATCC 700057 $\Delta$ <i>mutS2</i>                  | $\Delta$ <i>mutS2</i> deletion                                                                                                                            | This study                                              |
| ATCC 700057 $\Delta$ <i>mutSL</i>                  | $\Delta$ <i>mutSL</i> deletion                                                                                                                            | This study                                              |
| ATCC 700057 $\Delta$ <i>mutSL</i> :: <i>pmutSL</i> | $\Delta$ <i>mutSL</i> complemented with pMTL84151- <i>mutSL</i>                                                                                           | This study                                              |
| ATCC 700057 $\Delta$ <i>feoB1</i>                  | $\Delta$ <i>feoB1</i> deletion                                                                                                                            | This study                                              |
| ATCC 700057 $\Delta$ <i>feoB1</i> :: <i>pfeoB1</i> | $\Delta$ <i>feoB1</i> complemented with pMTL84151- <i>feoB1</i>                                                                                           | This study                                              |
| 491858 and 490054                                  | Clinical isolate                                                                                                                                          | (1, 2)                                                  |
| CD26A54_R                                          | Clinical isolate                                                                                                                                          | (3)                                                     |
| 491858::Empty vector                               | 491858 carrying plasmid pMTL84151.                                                                                                                        | This study                                              |
| 491858:: <i>pnifJ</i>                              | 491858 carrying plasmid pMTL84151 with <i>nifJ</i> driven by its own promoter.                                                                            | This study                                              |
| CD26A54_R::Empty vector                            | CD26A54_R carrying plasmid pMTL84151.                                                                                                                     | This study                                              |
| CD26A54_R:: <i>pnifJ</i>                           | CD26A54_R carrying plasmid pMTL84151 with <i>nifJ</i> driven by its promoter                                                                              | This study                                              |
| <b>Plasmids</b>                                    |                                                                                                                                                           |                                                         |
| pMTL-SC7215                                        | <i>E. coli</i> - <i>C. difficile</i> shuttle vector (pBP1 <i>catP</i> ColE1 <i>traJ</i> <i>codA</i> )                                                     | (4)                                                     |
| pMTL84151                                          | <i>E. coli</i> - <i>C. difficile</i> shuttle vector                                                                                                       | (5)                                                     |

|                            |                                                |            |
|----------------------------|------------------------------------------------|------------|
| pMTL84151- <i>mutSL</i>    | pMTL84151 with <i>mutSL</i> genes and promoter | This study |
| pMTL84151- <i>feoB1</i>    | pMTL84151 with <i>feoB1</i> gene and promoter  | This study |
| pMTL84151- <i>nifJ</i>     | pMTL84151 with <i>nifJ</i> gene and promoter   | This study |
| pXWpxyl-dcas9              | Xylose-inducible vector for gene knockdown     | (6)        |
| pXWpxyl- <i>feoB1</i> - AS | Xylose-inducible knockdown for <i>feoB1</i>    | This study |
| pXWpxyl- <i>nifJ</i> - AS  | Xylose-inducible knockdown for <i>nifJ</i>     | This study |
| pXWpxyl- <i>iscR</i> - AS  | Xylose-inducible knockdown for <i>iscR</i>     | This study |
| pXWpxyl- <i>xdh</i> - AS   | Xylose-inducible knockdown for <i>xdh</i>      | This study |

**Table S5.** Primers used in this study.

| Primer Name                  | Description                                     | Sequence                                                |
|------------------------------|-------------------------------------------------|---------------------------------------------------------|
| <b>For Sanger sequencing</b> |                                                 |                                                         |
| <i>feoB1-F</i>               | To confirm the mutations<br>Glu38fs and Lys40fs | TGATAAACGACGGCCAGTGGTGACCCA<br>ATTGAGGTAACAGTC          |
| <i>feoB1-R</i>               |                                                 | CAGGAAACAGCTATGACGCCTTTTCAG<br><br>CAGCTTCCATAATTC      |
| <i>nifJ-F</i>                | To confirm the mutation<br>Pro32Leu             | TGATAAACGACGGCCAGTGAAGATAGG<br>TATTTGCGCGAC             |
| <i>nifJ-R</i>                |                                                 | CAGGAAACAGCTATGACGCAGCCATAA<br>CGTCTTGGTG               |
| <i>nifJ-F</i>                | To confirm the mutation<br>Gln803Arg            | TGATAAACGACGGCCAGTGGTACTGCA<br>GCTTATGAAAAACGTGG        |
| <i>nifJ-R</i>                |                                                 | CAGGAAACAGCTATGACCTTAGCACTTG<br>CTACTTTAGAAGCTTCTCC     |
| <i>iscR-F</i>                | To confirm the mutation<br>Lys51fs and Val76Ala | TGATAAACGACGGCCAGTGTTTGTTTTA<br>TGATAATGAAGAGGC         |
| <i>iscR-R</i>                |                                                 | CAGGAAACAGCTATGACCTAATTTATTTT<br>TGTTATAGTCATTTATCATATC |
| <i>xdh-F</i>                 | To confirm the mutation<br>GAG2070GAA           | TGATAAACGACGGCCAGTGAGTTGGTAT<br>ACCTGATGTTGG            |
| <i>xdh-R</i>                 |                                                 | TCAGGAAACAGCTATGACCTCGGTTAGA<br>GCATATCCAAGAC           |
| Xanthine<br>permease-F       | To confirm the mutation<br>Gly270Asp            | TGATAAACGACGGCCAGTCTATTAGAGA<br>GGCAACTTGGTTTG          |
| Xanthine<br>permease-R       |                                                 | CAGGAAACAGCTATGACGCACAAATCTA<br>CTTATTACTTTGTTTCATAG    |
| <b>For Gene Deletions</b>    |                                                 |                                                         |
| up- <i>mutS-F</i>            | For fusion PCR to<br>delete <i>mutS</i>         | ATCTGGATCCGAAGCTATAATGCTATCA<br>AACAG                   |
| up- <i>mutS-R+</i>           | For fusion PCR to<br>delete <i>mutS</i>         | GCATCTAATGGAGATACTGTTTCATCATA<br>GGAG                   |
| down- <i>mutS-F+</i>         | For fusion PCR to<br>delete <i>mutS</i>         | GATGAAACAGTATCTCCATTAGATGCTA<br>TAAACTCTC               |
| down- <i>mutS-R</i>          | For fusion PCR to<br>delete <i>mutS</i>         | ATCTAAGCTTTGGTAGTTCCATTAGTAGA<br>ACC                    |
| up- <i>mutS2-F</i>           | For fusion PCR to<br>delete <i>mutS2</i>        | ATCTGGATCCCCCATGACTCATGTTCCCT<br>CC                     |
| up- <i>mutS2-R+</i>          | For fusion PCR to<br>delete <i>mutS2</i>        | CCACCTTCTCCCTAAAGAAGATGAGGCT<br>TTCTTC                  |
| down- <i>mutS2-F+</i>        | For fusion PCR to<br>delete <i>mutS2</i>        | CTCATCTTCTTTAGGGAGAAGGTGGAGC<br>AGGAG                   |



|                          |                                               |                                                 |
|--------------------------|-----------------------------------------------|-------------------------------------------------|
| down- <i>mutS2</i> -R    | For fusion PCR to delete <i>mutS2</i>         | ATCTAAGCTTTTTCTTGACTATCCAGTT<br>GAC             |
| down- <i>mutSL</i> -R+   | For fusion PCR to delete <i>mutSL</i>         | CAGCAGCAGCAGCAGCAGAGATACTGT<br>TTCATCATAGGAG    |
| up- <i>mutL</i> -F       | For fusion PCR to delete <i>mutL</i>          | ATCTGGATCCCAACAGTGTTGCAATAAA<br>TGGAG           |
| up- <i>mutL</i> -R+      | For fusion PCR to delete <i>mutL</i>          | CAGCAGCAGCAGCAGCAGCTGCTGCTA<br>TCTTATTTATAGTC   |
| down- <i>mutL</i> -F+    | For fusion PCR to delete <i>mutL</i>          | CTGCTGCTGCTGCTGCTGTAATGGTCTGA<br>AATATCTAAGACAG |
| down- <i>mutL</i> -R     | For fusion PCR to delete <i>mutL</i>          | ATCTAAGCTTAACTGAAAATGGATAGTC<br>AGGC            |
| $\Delta$ <i>mutS</i> -F  | For PCR confirmation of <i>mutS</i> deletion  | AAAACATCCATGCAAAAATGGC                          |
| $\Delta$ <i>mutS</i> -R  | For PCR confirmation of <i>mutS</i> deletion  | AAAATTTCTGTCTTGCTGGTG                           |
| $\Delta$ <i>mutS2</i> -F | For PCR confirmation of <i>mutS2</i> deletion | TTCATTTCCAGAACCTCTAGG                           |
| $\Delta$ <i>mutS2</i> -R | For PCR confirmation of <i>mutS2</i> deletion | CTATAATTGCAGTTTTTAATCACAC                       |
| $\Delta$ <i>mutL</i> -F  | For PCR confirmation of <i>mutL</i> deletion  | GGAGCAGACAAGAGTTATGG                            |
| $\Delta$ <i>mutL</i> -R  | For PCR confirmation of <i>mutL</i> deletion  | TGCCTCCAGTTACTAAAACAC                           |
| <i>feoB1</i> -F          | To confirm deletion of <i>feoB1</i>           | AGGTGAAGAAGTAGTTATAAAGAAAATT<br>TCGGG           |
| <i>feoB1</i> -R          | To confirm deletion of <i>feoB1</i>           | CTAATAATGCTCTTCCCAATCCACCGC                     |

| Primer Name                     | Description                                    | Sequence                                                           |
|---------------------------------|------------------------------------------------|--------------------------------------------------------------------|
| <b>For gene complementation</b> |                                                |                                                                    |
| <i>mutS</i> -F                  | For complementing $\Delta$ <i>mutSL</i> mutant | ATCTCTCGAGCCATTAGATGCTATAAAC<br>TCTC                               |
| <i>mutL</i> -R                  | For complementing $\Delta$ <i>mutSL</i> mutant | ATCTGAATTCAACTGAAAATGGATAGTC<br>AGGC                               |
| <i>nifJ</i> -F                  | For complementing clinical strains             | AAAGAGCTCTAAAAAATTACAAAATA<br>TGATG                                |
| <i>nifJ</i> -R                  | For complementing clinical strains             | AAAGGATCCGGCAAGATGGAAAAC                                           |
| <b>For RT-qPCR experiments</b>  |                                                |                                                                    |
| <i>feoB1</i> -qPCR<br>-F        | To analyze the expression of <i>feoB1</i>      | GGT CTC ATA GGA AAT CCT AAC TGT<br>GGT AAG ACA ACA ATG TTC AAT GGG |
| <i>feoB1</i> -qPCR<br>-R        | To analyze the expression of <i>feoB1</i>      | CCTTTTTTTTCAACTGTTACTCCTGGCCA<br>GTTACCAACATATTGTGATG              |
| <i>fhuB</i> -qPCR               | To analyze the expression of <i>fhuB</i>       | GCTGTACTIONTGTATTTGGAATTGTATTATC                                   |

|                                     |                                          |                                               |
|-------------------------------------|------------------------------------------|-----------------------------------------------|
| -F                                  |                                          | CATAACTATTGG                                  |
| <i>fhuB</i> -qPCR<br>-R             | To analyze the expression of <i>fhuB</i> | CAAGGGCAATAGCAGCTGCACTTGTG                    |
| <i>fdx</i> -qPCR-F<br>(CD630_06271) | To analyze the expression of <i>fdx</i>  | GCAAATATTTTAGCAAATGAGTGCG                     |
| <i>fdx</i> -qPCR-R<br>(CD630_06271) | To analyze the expression of <i>fdx</i>  | GACTAATGCCACATGGAAGTGAATAGC                   |
| <i>fdx</i> -qPCR-F<br>(CD630_36051) | To analyze the expression of <i>fdx</i>  | GAAAGCATTGTTGATAAGGATGTATGTG                  |
| <i>fdx</i> -qPCR-R<br>(CD630_36051) | To analyze the expression of <i>fdx</i>  | CTGTTATAGCTGAAAGTGGACATCCTTC                  |
| <i>fdx</i> -qPCR-F<br>(CD630_01721) | To analyze the expression of <i>fdx</i>  | CATATAAAATTACTGACGCTTGTATAAGCTGTG             |
| <i>fdx</i> -qPCR-R<br>(CD630_01721) | To analyze the expression of <i>fdx</i>  | CTGGTTGAGGTGCATCTACAGG                        |
| <i>fdx</i> -qPCR-F<br>(CD630_01150) | To analyze the expression of <i>fdx</i>  | GCAAATGTTAATCAAGATACTTGTATAGGTTG              |
| <i>fdx</i> -qPCR-R<br>(CD630_01150) | To analyze the expression of <i>fdx</i>  | CAACTGGACAGCTTTCTCTAGCTTC                     |
| <i>fdx</i> -qPCR-F<br>(CD630_19990) | To analyze the expression of <i>fdx</i>  | GGAGTGGAACAGGAAATACTGAAAAAATGGCAAATTTTGTGGCTG |
| <i>fdx</i> -qPCR-R<br>(CD630_19990) | To analyze the expression of <i>fdx</i>  | CTCCCATAGATGGGCAACCTAATGC                     |
| <i>fdx</i> -qpCR-F<br>(CD630_28250) | To analyze the expression of <i>fdx</i>  | GATGAAATTCAAGAAGAAAAAGACATAAAG                |
| <i>fdx</i> -qpCR-R<br>(CD630_28250) | To analyze the expression of <i>fdx</i>  | GCACTTGTTTTGAATTTTATCACAAATTC                 |
| <i>fdx</i> -qpCR-F<br>(CD630_16790) | To analyze the expression of <i>fdx</i>  | GATAATGTAGAGTTATTAACAAAAACAAGTTGGC            |
| <i>fdx</i> -qpCR-R<br>(CD630_16790) | To analyze the expression of <i>fdx</i>  | GATATTCTAAACTGTCATAATTACCTTTTGAAAC            |
| <i>fdx</i> -qpCR-F<br>(CD630_31210) | To analyze the expression of <i>fdx</i>  | GATATGTGGCTCGTAAAATTGCAC                      |
| <i>fdx</i> -qpCR-R<br>(CD630_31210) | To analyze the expression of <i>fdx</i>  | CTATTGGCAATCTCCATGCATAAG                      |
| <i>fdx</i> -qpCR-F<br>(CD630_22070) | To analyze the expression of <i>fdx</i>  | GAGGTCTTTATGCTTGTAATATAGCGGG                  |
| <i>fdx</i> -qpCR-R<br>(CD630_22070) | To analyze the expression of <i>fdx</i>  | CTTCTCTTAATTTCTTTATTACTTCATCATATATGG          |
| <i>fur</i> -qPCR-F                  | To analyze the expression of <i>fur</i>  | ACGCCACAAAGAAGAGCAAT                          |
| <i>fur</i> -qPCR-R                  | To analyze the expression of <i>fur</i>  | TCAGGACAGTCAACCCTAACT                         |

|                                     |                                          |                                                       |
|-------------------------------------|------------------------------------------|-------------------------------------------------------|
|                                     |                                          |                                                       |
| <i>nifJ</i> -qPCR-F                 | To analyze the expression of <i>nifJ</i> | GGCTAAGTTTATGAAAACACTTGATGGA<br>A ATACAGCTGCAGCTCATG  |
| <i>nifJ</i> -qPCR-n-R               | To analyze the expression of <i>nifJ</i> | CCCACATCAACTACTTCAGCCATAGT<br>TGAAGATGGTGTG           |
| <i>iscR</i> -qPCR-F                 | To analyze the expression of <i>iscR</i> | CGGGTCTAGTAA AAA GTG TGA GAG<br>GTGCTCAAGGAGG         |
| <i>iscR</i> -qPCR-R                 | To analyze the expression of <i>iscR</i> | CACATACATCTTCATCTAGTACACAGTC<br>AGATAATGCAACTGGTCCTTC |
| <i>xdh</i> -qPCR-F                  | To analyze the expression of <i>xdh</i>  | GTTGCAAAGAAGGCAAAAACTTTTAG                            |
| <i>xdh</i> -qPCR-R                  | To analyze the expression of <i>xdh</i>  | GAACTAATTACCATACCTGGAATACAAA<br>ATCC                  |
| <i>recA</i> -qpCR-F                 | To analyze the expression of <i>recA</i> | TGCAAAGCTTTGGGTGTGG                                   |
| <i>recA</i> -qpCR-R                 | To analyze the expression of <i>dnaK</i> | GCCTTTGGA ACTAATGCTGCT                                |
| <i>dnaK</i> -qpCR-F                 | To analyze the expression of <i>dnaK</i> | ATCCCCTGCTAAACTCCAGC                                  |
| <i>dnaK</i> -qpCR-R                 | To analyze the expression of <i>dnaK</i> | ACCAGCAGTACAAGAAGCTGTT                                |
| <i>hcp</i> -qpCR-F                  | To analyze the expression of <i>hcp</i>  | TGGAGGTTGTGATGGTGCAA                                  |
| <i>hcp</i> -qpCR-R                  | To analyze the expression of <i>hcp</i>  | AGCCACCTATATCCCCAAGGT                                 |
| <i>norV</i> -qpCR-F                 | To analyze the expression of <i>norV</i> | TTGGTTGGAGTGGTGAAGGT                                  |
| <i>norV</i> -qpCR-R                 | To analyze the expression of <i>norV</i> | GCAAATTCTGCACCAAATGCC                                 |
| <i>trx</i> -qpCR-F<br>(CD630_30330) | To analyze the expression of <i>trx</i>  | ATTTCTTTGCGACTTGGTGTGG                                |
| <i>trx</i> -qpCR-R<br>(CD630_30330) | To analyze the expression of <i>trx</i>  | TCCACCTTCAAGAAGTTTGCT                                 |

**Table S6.** Gene knockdown, gene deletion and gene complementation constructs.

**a) sgRNA targeting *feoB1***

GTTTAACTAAGTTAGTTTAAATATACTAACA AATTGACAAAGATAATTA AATATTTTTAT  
TATTAGTTCAATTGTTGTCTTACCACAGTTGTTTTAGAGCTAGAAATAGCAAGTTAAA  
ATAAGGCTAGTCCGTTATCAACTTGAAAAAGTGGCACCGAGTCGGTGCTTTTTTTTA  
AGTTAGTTTAAATATACTAACA AATTGACAAAGATAATTA AATATTTTTATTATTAGTTCA  
GGAGATAAAGAATAAATACCGTTTTAGAGCTAGAAATAGCAAGTTAAAATAAGGCTA  
GTCCGTTATCAACTTGAAAAAGTGGCACCGAGTCGGTGCTTTTTTTGTTTAAAC

**b) sgRNA targeting *nifJ***

GTTTAACTAAGTTAGTTTAAATATACTAACA AATTGACAAAGATAATTA AATATTTTTAT  
TATTAGTTTACATGCTACATCTGTAAACGCATGTTTTAGAGCTAGAAATAGCAAGTTAA  
ATAAGGCTAGTCCGTTATCAACTTGAAAAAGTGGCACCGAGTCGGTGCTTTTTTTT  
AAGTTAGTTTAAATATACTAACA AATTGACAAAGATAATTA AATATTTTTATTATTAGTTC  
ACTCCTCCTTGTAAGAACCGGTTTTAGAGCTAGAAATAGCAAGTTAAAATAAGGCT  
AGTCCGTTATCAACTTGAAAAAGTGGCACCGAGTCGGTGCTTTTTTTGTTTAAAC

**c) sgRNA targeting *iscR***

GTTTAACTAAGTTAGTTTAAATATACTAACA AATTGACAAAGATAATTA AATATTTTTAT  
TATTAGTTTACAGCAATAAATTTTTAATGATACGTTTTAGAGCTAGAAATAGCAAGTTAAA  
ATAAGGCTAGTCCGTTATCAACTTGAAAAAGTGGCACCGAGTCGGTGCTTTTTTTTA  
AGTTAGTTTAAATATACTAACA AATTGACAAAGATAATTA AATATTTTTATTATTAGTTCA  
ACACAGTCAGATAATGCAACGTTTTAGAGCTAGAAATAGCAAGTTAAAATAAGGCTA  
GTCCGTTATCAACTTGAAAAAGTGGCACCGAGTCGGTGCTTTTTTTGTTTAAAC

**d) sgRNA targeting *xdh***

GTTTAACTAAGTTAGTTTAAATATACTAACA AATTGACAAAGATAATTA AATATTTTTAT  
TATTAGTTTATTATATTCATATCTTCTCTAGTTTTAGAGCTAGAAATAGCAAGTTAAA  
ATAAGGCTAGTCCGTTATCAACTTGAAAAAGTGGCACCGAGTCGGTGCTTTTTTTTA  
AGTTAGTTTAAATATACTAACA AATTGACAAAGATAATTA AATATTTTTATTATTAGTTCA  
TTTGAACATAATTACCATAACCGTTTTAGAGCTAGAAATAGCAAGTTAAAATAAGGCTA  
GTCCGTTATCAACTTGAAAAAGTGGCACCGAGTCGGTGCTTTTTTTGTTTAAAC

**d) *feoB1* deletion fragment**

GTTTAAACAGGTGAAGAAGTAGTTATAAAGAAAATTTCCGGGAAGTGATAAGACGAG  
GACTTTTTTAAATAGTATAGGTTTTGTAGTGGGTACAAATGTTAAAATAGTTTCTAAG  
ATAGATGGTAACTTAATAATAGACGTAAAAGATACTAGAGTTGCATTAGATAAAAAA  
ATGGCAAGTAGAATAATAATATAGGGAGGTAATGACATGAACAGACTGAAGGATAT  
TAAGTGTGGAGAGACTGTAAAAGTCAAAAAGTTAGAAGGAGAAGGAGCTACACGA  
AGACGTATAATGGATATGGGGATTACAAGAGGTGTTAATATATTTATAAGAAAAGTA  
GCTCCTCTTGGTGACCCAATTGAGGTAACAGTCAGAGATTATGAACTATCAATTCG  
TAAGTCAGATGCAGAAAAAATTATTGTGGAATAATAAAGATTAATTAGAGTAGGGTT  
AATGTAATTATATAATGAGAATGATTTTCTGTATCACAAACAGTGATGTATTTAATA  
ATAATGGAGGGAATGGAAATGTCAATAAAAATAGGTCTGTTATATGAAAAATTAATT  
CATATAAATAAGGAGTGATGAATATGGCTACATTTATTATAGCAGCTATTGTAGTAG  
TATTAATGGCACTAGCTGTAATGTATATGGTTAAAATTCAAAAAGAATGGTAGCA  
GTTGTGGATGTGGTTGTTCTGGATGCTCAAGTAGTAAGAGTTGTCATAGCGCTAAG  
AGATAAATAGGATAAGAGCCTGATAAAAAGTTGAATTGCTTTATTATCAGGTTCTTA  
TTTTTTGTATAAATAACA AATTTTCATATTTGAAGTAGGTTAGACTATGCTGTAATTTTA

CTGTATAATTATATATAAATATATGATTAGGAGGGATTATTGCTAAATTAAGCAATAT  
AAGTGAATATTATGTTTTAAATTTGATGTTACAAACGAGCTTATGTGTATAGCAAGGG  
GAAGTGGTAAATTTTTGCAAAAAAAGGTGCTATGGTAGCCTTTAAAGGAAATTTTA  
ATTTTGA AAAATTGCTGTTAGGTCCAAGTAATGGCGGTGGATTGGGAAGAGCATT  
TTAGGTTTTAAAC

**e) *feoB1* complementation fragment**

CCCGGGTATTATTTTAATAGATTAAGATTTAAGGTATTGTAATTTATATATAAGATAA  
CGATTGCTTGTAGATTTAAACTTTTTAATGGAGGGAATGGAAATGTCAATAAAAA  
TAGGTCTCATAGGAAATCCTAACTGTGGTAAGACAACAATGTTCAATGGGCTTACA  
GGCTCATCACAATATGTTGGTAACTGGCCAGGAGTAACAGTTGAAAAAAAAGGTGG  
AAAATTAAGGAAATAAAGATGTGGAAATAGTAGATTTACCAGGTATTTATTCTTTA  
TCTCCATATACATTAGAAGAAGTAGTTACACGTAATTTTATGCTAGATGATAAGCCG  
GATGCAGTAATAAATATTGTAGATGCATCAAATATAGAGAGAAATTTATATCTTACAA  
CTCAAGTTTTAGAGCTAGGTATACCGACCGTTATAGCTCTTAATATGATGGATATTG  
TAAATAAGAATGGTGATAAGATAAATATTAAGAAGTATCTGAAGTTATAGGTTGCC  
CAGTGGTAGAAGTAACAGCAGTTAAAGGTCAAGGAATTATGGAAGCTGCTGAAAAG  
GCAGTTGAACTTGCAAGTAGTAACAATAAATTAATTTCAAATTACCCTTTGTTGAT  
GAAAGTAAGGATGCAATAGAAAAAATTGAAAAAATAATAGAAGAAAAGACTCCATAT  
ATAGATGTAGAAACACGCTGGTTAGCTATAAAGCTATTTGAGAGAGATGAAAATGTT  
ATACAAAACTTAATATTTCTAAAACAATATTGAATAGTATTGAAGAAATAACTAGAA  
ATTGTGAAGATGAATTGGATGATGATAGTGAAAGTATAATAACAGCCAATCGTTATG  
AATTTATTAGTTCAATAATTTCAAGTATAATAAGAAGAATCGAAAAGGTAAGGAAA  
CTGTATCAGATAAGATAGATAAGATTGTAACAAATCGTATACTAGCATTACCTATTTT  
TGCACCTATAATGTGGGGAGTTTACTATATAGCAGTAAGTTCATTGGGTACTATAGC  
AACTGATTGGACAAATGATGTACTGTTTGGAGAAATTATTCAAGGCAATGTAAGTAA  
TTTTCTAGCTTCTTTAAATGTAGCAGAGTGGTTACAAGGACTTGTAGTTGATGGTCT  
AATTGGTGGAGTTGGAGCAGTACTAGGATTTGTACCACAAATCATGCTTTTATTCTT  
ATTATTATCAATATTAGAAGATTGTGGGTACATGTCACGTGTAGCTTTTATAATGGAT  
AGAATTTTCCGTAAGTTTGGTCTTTCAGGAAAATCATTTATACCAATGCTTATAAGTT  
CAGGTTGTGGAGTTCCAGGAGTTATGTCAACTCGTACTATAGAGAATGATAGAGAT  
AGAAAATGACTATTATGTTAACTACATTCAATCCATGTGGAGCTAAGATTCCAATA  
ATAGCATTATTTGCAGGGGCATTATTTGGAGGTGCTTCATGGGTAGCTCCATCAAT  
GTATTTCTTAGGTATTGCAATGATAATCATTGTGGAATTATATTAAGAAAAGTACTAGT  
TTATTTGCAGGAGAACCATCTCCATTTGTTATGGAATTACCTCAATATCATATTTCAA  
GTGCAAAAGGTGTTTTAATACATATGTGGGATAGAGGAAAAGCATTTATAATCAAAG  
CAGGAACAATTATATTTGTTGCTTGTGGAGTAATCTGGTTCTTACAATCATTTAATTG  
GTCATTACAAATGGTAGATGCTGGAGATAGTATATTAGCTAGCTTAGGAAATATAGT  
TGCACCAATATTTGCTCCTCTTGGATTTGGAAATTGGCAATCATCAGTAGCAACAGT  
TACAGGTCTAGTAGCTAAGGAAAATGTAGTTGGAACATTTGGAGTTTTATTTGGTAT  
ATCAGATGCAACAGAGCAAGACCCAACACTTCTTGCTTCAGTTGCAAGCATGTTTA  
CAGTAGCTAGTGCGTTTGCATTTATGGCATTTAATATGCTTTGTGCACCTTGTTTTG  
CAGCTATTGGAGCCATAAAAAGAGAAATGGGTTTCATGGAAATGGACATGGATTACA  
TTAGGATTCCAACTTTAACAGCGTATATAATTGCTCTTCTTATAAATCAAGTTGGAA

GTTTAGTTTTAGGTACTGGAGGAAGTATTGCTGGGGCAATAATATCTATATTTATAG  
CAGTAGCAGTAGTCTTTGTAGTTTTAACTTATTCAAATAAAAATATGAAAAAAGAAAA  
AATGGGTAAATTAAGTTATATGAAAAATTAATCTAGA

**Table S7.** List of accession numbers for genomes of strains deposited in NCBI.

| <b>Strain name</b> | <b>BioSample Accession Number</b> |
|--------------------|-----------------------------------|
| JWD-1              | SAMN13506423                      |
| JWD-2              | SAMN13506424                      |
| JWD-3              | SAMN13506425                      |
| JWD-4              | SAMN13506426                      |

## References

1. Adler A, Miller-Roll T, Bradenstein R, Block C, Mendelson B, Parizade M, Paitan Y, Schwartz D, Peled N, Carmeli Y, Schwaber MJ. 2015. A national survey of the molecular epidemiology of *Clostridium difficile* in Israel: the dissemination of the ribotype 027 strain with reduced susceptibility to vancomycin and metronidazole. *Diagn Microbiol Infect Dis* 83:21-4.
2. Shen WJ, Deshpande A, Hevener KE, Endres BT, Garey KW, Palmer KL, Hurdle JG. 2020. Constitutive expression of the cryptic vanGCd operon promotes vancomycin resistance in *Clostridioides difficile* clinical isolates. *J Antimicrob Chemother* 75:859-867.
3. Lynch T, Chong P, Zhang J, Hizon R, Du T, Graham MR, Beniac DR, Booth TF, Kibsey P, Miller M, Gravel D, Mulvey MR, Canadian Nosocomial Infection Surveillance P. 2013. Characterization of a stable, metronidazole-resistant *Clostridium difficile* clinical isolate. *PLoS One* 8:e53757.
4. Cartman ST, Kelly ML, Heeg D, Heap JT, Minton NP. 2012. Precise manipulation of the *Clostridium difficile* chromosome reveals a lack of association between the tcdC genotype and toxin production. *Appl Environ Microbiol* 78:4683-90.
5. Heap JT, Pennington OJ, Cartman ST, Minton NP. 2009. A modular system for *Clostridium shuttle* plasmids. *J Microbiol Methods* 78:79-85.
6. Marreddy RKR, Wu X, Sapkota M, Prior AM, Jones JA, Sun D, Hevener KE, Hurdle JG. 2019. The Fatty Acid Synthesis Protein Enoyl-ACP Reductase II (FabK) is a Target for Narrow-Spectrum Antibacterials for *Clostridium difficile* Infection. *ACS Infect Dis* 5:208-217.
